# Supplementary material for: A MoS2–MWCNT based fluorometric nanosensor for exosome detection and quantification
Source: PubMed Central journal article supplement (PMC9419881; doi:10.1039/c9na00248k), 2019-06-19
Supplement: NA-001-C9NA00248K-s001.pdf [file NA-001-C9NA00248K-s001.pdf]

## Supplementary Information

# MoS<sub>2</sub>-MWCNT based Fluorometric Nanosensor for Exosome Detection and Quantification

Mahnoush Tayebi <sup>a</sup>, Mohammad Tavakkoli Yaraki <sup>b,c</sup>, Hui Ying Yang <sup>a</sup> and Ye Ai <sup>a,\*</sup>

<sup>a</sup> Pillar of Engineering Product Development, Singapore University of Technology and Design, 8 Somapah Road, Singapore 487372, Singapore

<sup>b</sup> Department of Chemical and Biomolecular Engineering, National University of Singapore, 4 Engineering Drive 4, Singapore 117585, Singapore

<sup>c</sup> Institute of Materials Research and Engineering, Agency for Science, Technology, and Research (A\*STAR), 2 Fusionopolis Way, 138634, Singapore

\* Corresponding author. Email: [aiye@sutd.edu.sg](mailto:aiye@sutd.edu.sg); Tel: (+65) 6499 4553

---

**a**

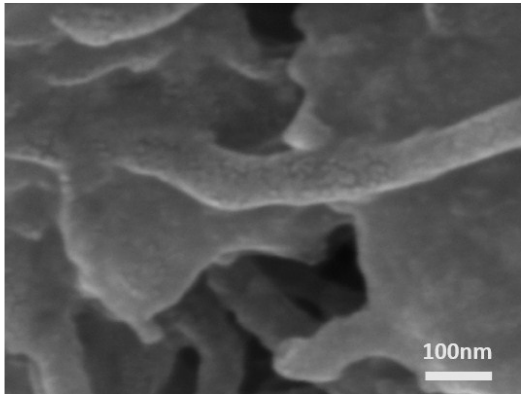

**b**

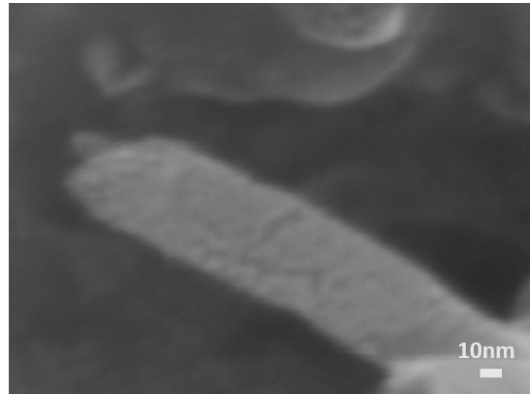

*Fig. S1 Scanning electron microscopy of MoS<sub>2</sub>-MWCNT with different magnification in (a) and (b).*

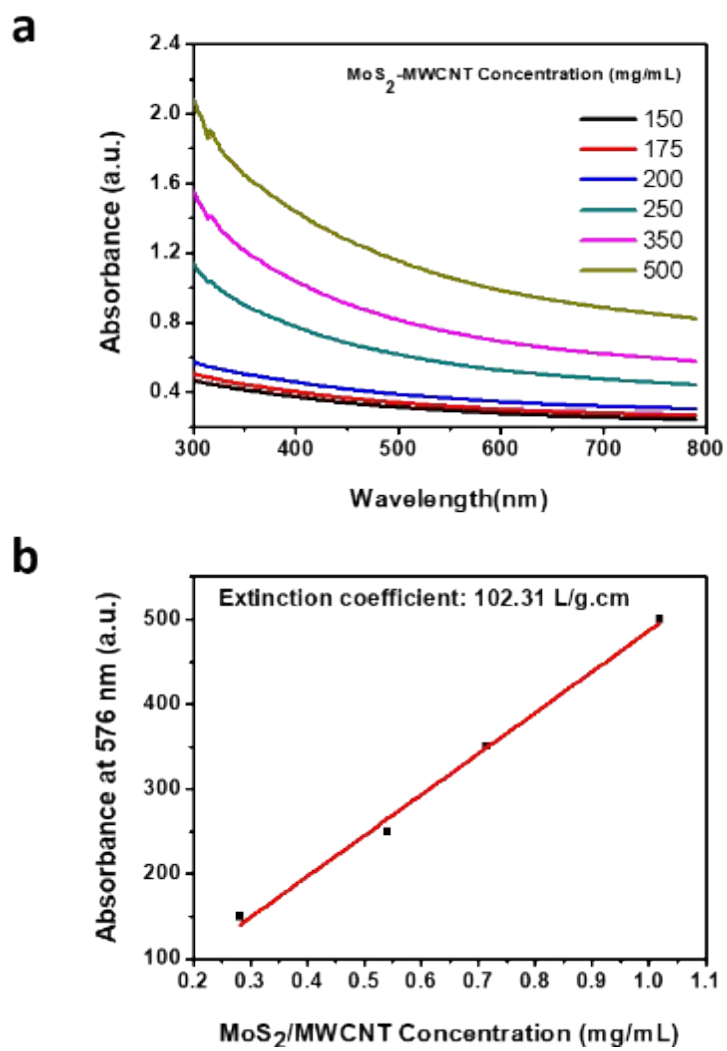

Fig. S2 Absorbance of different concentrations of MoS<sub>2</sub>-MWCNT with a broad absorption band from UV to NIR region, which is a good candidate for PE (R-phycoerythrin) with emission wavelength of 575 nm.

**Table S1.**

The parameters of general nonlinear Stern-Volmer model for fluorescence quenching of anti-CD63-PE in the presence of MoS<sub>2</sub>-MWCNT as a quencher

| <b>K<sub>s</sub> (mL/mg)</b> | <b>K<sub>D</sub> (mL/mg)</b> | <b>f</b> | <b>n</b> | <b>R<sup>2</sup></b> |
|------------------------------|------------------------------|----------|----------|----------------------|
| 7.724×10 <sup>-8</sup>       | 0.02743                      | 0.9903   | 3.474    | 0.9852               |

**Table S2**

Comparison of the Limit of Detection (LOD) and Detection Time of Different Methods for Exosome Determination

| Detection Method                                                                                           | Purification Method                                                             | Detection Time | Limit of Detection             | Method Limitation                                                                                     | Reference |
|------------------------------------------------------------------------------------------------------------|---------------------------------------------------------------------------------|----------------|--------------------------------|-------------------------------------------------------------------------------------------------------|-----------|
| Anodic stripping voltammetric quantification                                                               | Total exosome isolation reagent and CD63 antibody-functionalised magnetic beads | >1hr           | $10^5$ exosomes/mL             | Not given                                                                                             | 1         |
| Aptamer based electrochemical biosensor                                                                    | ExoQuick-TC exosome precipitation reagent                                       | 83 min         | $10^6$ exosomes/mL             | Not given                                                                                             | 2         |
| Colorimetric (mimicking peroxidase ability of single-wall carbon nanotubes)                                | Ultracentrifugation                                                             | 40 min         | $5.2 \times 10^8$ exosomes/mL  | Susceptible to interference due to developing a "signal-on" strategy to replace "signal-off" strategy | 3         |
| Electrochemical                                                                                            | Total exosome isolation reagent                                                 | 60 min         | $4.7 \times 10^8$ exosomes/mL  | Not given                                                                                             | 4         |
| Nanostructured herringbone chip combined with a sandwich exosome enzyme-linked immunosorbent assay (ELISA) | Exosome capture on the antibody modified chips/ ultracentrifugation             | -              | $10^4$ exosomes/mL             | Limited preparative sample processing capacity for bulk exosomal content analysis                     | 5         |
| Microfluidic and fluorescence                                                                              | immobilizing vesicles in a microfluidic device (ExoChip)                        | 70 min         | 0.5 pM                         | Not given                                                                                             | 6         |
| Electrochemical sandwich immunosensor                                                                      | Ultracentrifugation                                                             | 60 min         | $2 \times 10^5$ exosomes/mL    | Long incubation times and multi-steps process                                                         | 7         |
| Fluorescence                                                                                               | Total exosome isolation reagent                                                 | 60 min         | $14.8 \times 10^5$ exosomes/mL | Susceptible to influence from nonspecific interactions of antibodies                                  | This work |

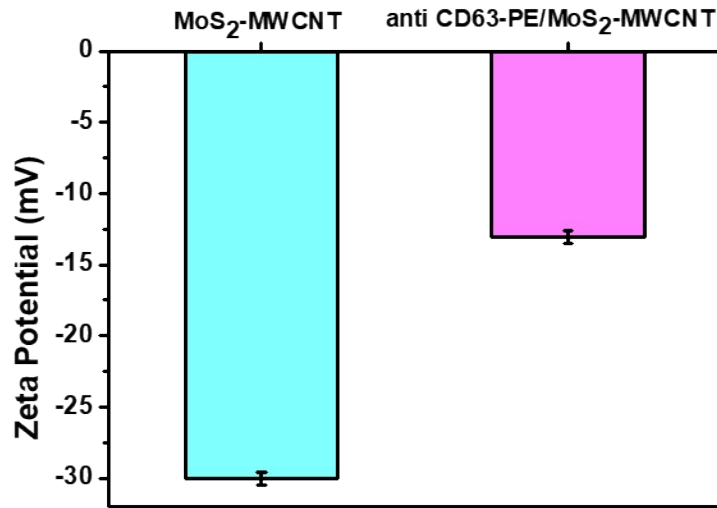

Fig. S3 Zeta potential of MoS<sub>2</sub>-MWCNT nanocomposites (a) before and (b) after adding anti CD63-PE, which shows a significant decrease in the zeta potential value and confirms the adsorption of anti CD63-PE on MoS<sub>2</sub>-MWCNT.

## References

1. Boriachek, K.; Islam, M. N.; Gopalan, V.; Lam, A. K.; Nguyen, N.-T.; Shiddiky, M. J. A., Quantum dot-based sensitive detection of disease specific exosome in serum. *Analyst* **2017**, *142* (12), 2211-2219.
2. Zhou, Q.; Rahimian, A.; Son, K.; Shin, D.-S.; Patel, T.; Revzin, A., Development of an aptasensor for electrochemical detection of exosomes. *Methods* **2016**, *97*, 88-93.
3. Xia, Y.; Liu, M.; Wang, L.; Yan, A.; He, W.; Chen, M.; Lan, J.; Xu, J.; Guan, L.; Chen, J., A visible and colorimetric aptasensor based on DNA-capped single-walled carbon nanotubes for detection of exosomes. *Biosensors and Bioelectronics* **2017**, *92*, 8-15.
4. Yadav, S.; Boriachek, K.; Islam, M. N.; Lobb, R.; Möller, A.; Hill, M. M.; Hossain, M. S. A.; Nguyen, N. T.; Shiddiky, M. J., An Electrochemical Method for the Detection of Disease-Specific Exosomes. *ChemElectroChem* **2017**, *4* (4), 967-971.
5. Zhang, P.; Zhou, X.; He, M.; Shang, Y.; Tetlow, A. L.; Godwin, A. K.; Zeng, Y., Ultrasensitive detection of circulating exosomes with a 3D-nanopatterned microfluidic chip. *Nature Biomedical Engineering* **2019**, *1*.
6. Kanwar, S. S.; Dunlay, C. J.; Simeone, D. M.; Nagrath, S., Microfluidic device (ExoChip) for on-chip isolation, quantification and characterization of circulating exosomes. *Lab on a Chip* **2014**, *14* (11), 1891-1900.
7. Doldán, X.; Fagúndez, P.; Cayota, A.; Laíz, J.; Tosar, J. P., Electrochemical Sandwich Immunosensor for Determination of Exosomes Based on Surface Marker-Mediated Signal Amplification. *Analytical Chemistry* **2016**, *88* (21), 10466-10473.
